# Supplementary material for: The 55K SNP-Based Exploration of QTLs for Spikelet Number Per Spike in a Tetraploid Wheat (Triticum turgidum L.) Population: Chinese Landrace “Ailanmai” × Wild Emmer
Source: Front Plant Sci. 2021 Aug 31;12:732837. doi: 10.3389/fpls.2021.732837 (PMC8439258; doi:10.3389/fpls.2021.732837)
Supplement: Supplementary Table 5 — QTL detected in the QTL-by-environment interaction (QEI) module. [file Table_5.XLSX]

## Sheet: Sheet1
Supplementary Table 5 Quantitative trait loci (QTL) detected in the QTL-by-Environment interaction analysis
Chromosome	Left Marker	Right Marker	LOD	LOD (A)a	LOD (A by E)b	PVE	PVE (A)c	PVE (A by E)d	Add	Add_E1e	Add_E2e	Add_E3e	Add_E4e	Add_E5e	Add_E6e	Add_E7e	Add_E8e	Detected QTL
1A	AX-110038607	AX-110167459	11.04	9.44	1.6	4.28	2.18	1.01	-0.39	0.13*	-0.66**	0.05	-0.13**	0.15*	0.2	0.17	0.11**
2A	AX-108949998	AX-109355803	7.16	6.17	1	2.18	1.46	0.17	-0.31	-0.08**	0.05*	-0.05*	0.18*	-0.10*	-0.08*	0.16*	-0.07
3A	AX-109901092	AX-108885694	7.44	2.12	5.33	1.7	0.5	0.76	0.18	-0.02*	-0.02	0.03*	-0.03**	0.11	-0.46	0.43**	-0.04**
4A	AX-109272723	AX-110524110	7.23	3.21	4.02	1.85	0.73	0.65	-0.22	0.36	0.06*	0.07	-0.09	-0.19	0.14	0.03	-0.38**
5A	AX-109369427	AX-111451573	14.66	6.4	8.26	3.36	1.53	0.98	-0.33	-0.03**	0.37**	0.14**	0.27**	-0.15*	0.07	-0.54**	-0.13**
5A	AX-108790581	AX-111499991	14.11	11.19	2.93	4.51	2.53	0.83	-0.41	-0.39**	0.27**	-0.32**	-0.12**	0.13*	0.03*	0.27**	0.13**	QSns.sau-AM-5A
6A	AX-109842268	AX-108785002	8.87	5.19	3.69	3.49	1.25	1.35	0.29	-0.41	0.62**	-0.09	0.09	0.18	-0.10**	-0.34*	0.05
6A	AX-110007785	AX-111573430	8.36	4.15	4.2	2.1	0.98	0.58	0.26	-0.31	-0.29**	-0.01	0.18	0.2	-0.09**	0.24**	0.07
7A	AX-108868028	AX-110998408	7.26	5.59	1.67	2.54	1.34	0.55	0.3	-0.29	0.28*	0.03**	0.07**	0.24**	-0.03**	-0.04	-0.26
2B	AX-108767773	AX-109818835	8.3	6.88	1.42	2.83	1.63	0.48	-0.33	0.01**	0.01**	-0.17**	-0.34**	0.18**	0	0.28**	0.04**
2B	AX-109507945	AX-109421413	18.9	14.01	4.89	5.27	3.4	0.52	-0.49	0.31**	0.04**	0.05**	0.22**	-0.26**	0.01**	-0.23**	-0.15**	QSns.sau-AM-2B.1
2B	KASP-AX-109422178	AX-111588559	65.29	59.87	5.42	23.98	17.06	0.81	-1.07	-0.10**	0.17**	-0.41**	0.27**	0.24**	-0.30**	0.05**	0.07**	QSns.sau-AM-2B.2
3B	AX-110399975	AX-109050064	17.09	10.35	6.73	5.34	2.51	1.47	0.42	-0.28**	0.34**	-0.22**	0.36**	0.05**	0.27*	-0.36**	0.51**	QSns.sau-AM-3B.1
3B	AX-109393346	AX-110548993	26.08	17.04	9.04	8.96	4.29	2.39	0.55	0.28**	0.44**	0.51**	-0.43**	-0.11*	-0.45**	0.33**	-0.47**	QSns.sau-AM-3B.2
5B	AX-108741628	AX-108886770	9.25	4.43	4.83	2.7	1.06	0.96	0.27	-0.20*	-0.1	0.19*	0.06*	0.20*	-0.37	-0.22	0.45**
5B	AX-111001298	AX-110961703	7.41	4.44	2.96	2.46	1.06	0.77	0.27	0.32*	-0.33	0.29*	0.18*	0.06	-0.19	-0.2	-0.15*
5B	AX-110911600	AX-109870696	7.28	3.61	3.68	2.13	0.86	0.73	0.24	-0.19	-0.45	0.17*	0.25**	0.13*	-0.04	-0.07	0.21**
a LOD (A): LOD score for additive and dominance effects.
b LOD (A by E): LOD score for additive and dominance by environment effects.
c PVE (A): Phenotypic variation explained by additive and dominance effect at the current scanning position.
d PVE (A by E): Phenotypic variation explained by additive and dominance by environment effect at the current scanning position.
e Estimated additive effect of QTL at the current scanning position for each environment.
* (p < 0.05) and ** (p < 0.01) indicates that the effects of A by E were significant. In order to determine significance, we divided the mapping population into two haplotype groups (with homozygous alleles from any parent) using the flanking marker genotype of each QTL, and assessed for significance by Student’s t-test in each environment.
