# Supplementary material for: The 55K SNP-Based Exploration of QTLs for Spikelet Number Per Spike in a Tetraploid Wheat (Triticum turgidum L.) Population: Chinese Landrace “Ailanmai” × Wild Emmer
Source: Front Plant Sci. 2021 Aug 31;12:732837. doi: 10.3389/fpls.2021.732837 (PMC8439258; doi:10.3389/fpls.2021.732837)
Supplement: Supplementary Table 6 — Details of kompetitive allele-specific PCR (KASP) markers. [file Table_6.xlsx]

## Sheet: Sheet1
Supplementary Table 6 Details of KASP markers
Primer	Sequence (5'-3')
KASP-AX-111588559-F	GAAGGTGACCAAGTTCATGCTGACCTATCCTTGATGAAATT
KASP-AX-111588559-H	GAAGGTCGGAGTCAACGGATTGACCTATCCTTGATGAAATC
KASP-AX-111588559-R	GGTACAAACGCACTCTGGTAA
KASP-AX-110548993-F	GAAGGTGACCAAGTTCATGCTAGTCGCCATATCCGTCTTCG
KASP-AX-110548993-H	GAAGGTCGGAGTCAACGGATTAGTCGCCATATCCGTCTTCA
KASP-AX-110548993-R	CTCAGCGTTGTGGAGCTTACC
Note: Red font is FAM fluorescence sequence and blue font is HEX fluorescence sequence
